# Supplementary material
Source: publisher site journal article supplement (https://www.dovepress.com/article/436349)
Supplement: Supplementary file 1 [file get_supplementary_file.php]

**Supplementary Table 1. Definitions of variables**

| **Variables** | **Definitions** | **Specialists** |
| --- | --- | --- |
| Age | Patients’ age on date of surgery | Electronic medical record (EMR) recorded by orthopedists |
| Sex | Patients’ sex |
| BMI | Patients’ body mass index (BMI) on admission |
| Residence | Patients’ living condition based on current address |
| Education | Patients’ education level by self-report |
| Nationality | Patients’ nationality according to ID card |
| Marriage | All patients were marriage and if their spouse was died, they were labeled as widowed. |
| Smoke | Current smoker within 30 days before admission |
| Drink | Current drinker within 30 days before admission |
| Comorbidities | All data of comorbidities was collected by patient’s self-report. We focused on diseases of cardiovascular, respiratory, digestive, urinary, nervous and endocrine system, and common diseases of every system were listed separately. Moreover, we also recorded the history of anesthesia and general anesthesia. |
| Laboratory test results | The first results of laboratory blood tests after admission |
| Score of fall risk scale | The John Hopkins hospital fall assessment tool to assess the risk of fall | Nurses |
| Fall risk | The conclusion of John Hopkins hospital fall assessment tool according to score: <6 points is low risk; 6-13 points is moderate risk; >13 points is high risk |
| VAS | Visual Analogue Scale (VAS) to assess pain; 0 point as no pain and more than 1 point as pain |
| Blood pressure met surgical criteria | Blood pressure was measured at admission and SBP>140mmHg or DBP>90mmHg were defined as not meet surgical criteria. | Cardiologists |
| Fasting glucose met surgical criteria | Fasting glucose was measured at admission and >7.8 mmol/L or <3.9 mmol/L were defined as not meet surgical criteria. | Geriatricians |
| Score of ADL scale | **The Activity of Daily Living** (ADL) scale to assess patients’ functional Status |
| ADL | The conclusion of ADL scale according to score: 100 points as normal, 75-99 points as mild disability, 50-75 points as moderate disability and <50 as severe disability |
| Score of IADL scale | The Instrumental Activity of Daily Living (IADL) scale to assess patients’ functional status |
| IADL | The conclusion of IADL scale according to score: <7 points as disability |
| Score of frailty scale | The Fried Frailty Phenotype scale to assess frailty |
| Frailty | The conclusion of frailty scale according to score: 0 point as normal, 1-2 points as pre-frailty, 3-5 points as frailty |
| Score of PRF risk scale | The Arozullah Postoperative Respiratory Failure Predictive Score Scale to assess patient’s risk of postoperative respiratory failure (PRF) |
| Incidence rate of PRF | The incidence rate of PRF was classified according to score: ≤10 points as 0.5%, 11-19 points as 1.8%, 20-27 points as 4.2%, 28-40 points as 10.1%, >40 points as 26.6% |
| Score of STOP-Bang scale | The STOP-Bang Questionnaire to assess obstructive sleep apnea (OSA) |
| Risk of OSA | The conclusion of STOP-Bang scale according to score: <3 points as low risk and ≥3 points as high risk |
| Score of Caprini risk scale | The Caprini risk assessment model to assess the risk of thrombosis |
| Risk of thrombosis | The conclusion of Caprini risk assessment model according to score: ≤1 point as low risk, 2 points as moderate risk, 3-4 points as high risk and ≥5 points as very high risk |
| Score of MNA scale | The Mini-Nutritional Assessment (MNA) scale to assess patient’s nutritional status | Nutritionists |
| Nutritional status | The conclusion of MNA scale according to score: ≥24 points as well-nourished, 17-23 points as at risk of malnutrition, <17 points as malnourished |
| Preoperative MoCA score | the Montreal Cognitive Assessment (MoCA) scale to assess preoperative cognitive function | Neurologists |
| Cognitive impairment | Cognitive impairment was defined as MoCA≥23 points |
| Stroke risk | The stroke risk was assessed by Modified Framingham Stroke Risk Scale or Essen Stroke Risk Scale and classified low/moderate/high risk according to score. |
| Score of SAS scale | The Zung’s Self-Rating Anxiety Scale (SAS) to assess patient’s anxiety. |
| Score of SDS scale | The Zung’s Self-Rating Depression Scale (SDS) scale to assess patient’s depression |
| Mental health | Patients with anxiety or depression or both of them. Anxiety is defined as SAS scale≥40 points, depression was defined as SDS scale≥50 points |
| ASA class | The American Society of Anesthesiologists class (ASA) class to assess perioperative morbidity and mortality. It was classified as Class 1-6 and our subjects were only assessed as class 1-3. | Anesthetists |
| Drug risk | Patients’ current usage of high-risk medication according to detailed medication history | Pharmacists |
| Polypharmacy | Patients’ current usage of more than five medications at the same time |
| Spinal localization | Patients’ surgical sites including cervical spine, thoracolumbar spine, lumbar, both cervical spine and lumber. | the electronic surgical records by surgeons |
| Number of spines involved | Operated number of spines during surgery, reflecting operational invasive level |
| Operative time | Patients’ total surgical time | the electronic anesthesia records by anesthetists |
| Intraoperative blood loss | Patients’ total volume of blood loss during surgery |
| Intraoperative blood transfusion | Patients’ total volume of blood transfusion during surgery |
| Intraoperative urinary volume | Patients’ total urinary volume during surgery |
| BIS monitoring | Patients whether applied bispectral index (BIS) to monitor the depth of anesthesia |
| Cerebral rSO2 monitoring | Patients whether applied Cerebral regional oxygen saturation (rSO2) to monitor cerebral oxygenation |
| Anaesthetic usage | Kinds of anaesthetic usage during surgery including drugs for induction of anesthesia, drugs for maintenance of anesthesia, vasoactive agents |
| Drugs for induction of anesthesia | Drugs for induction of anesthesia including Propofol, Etomidate, Midazolam, Remifentanil, Sufentanil, Oxycodone, Rocuronium, Cisatracurium Besylate |
| Drugs for maintenance of anesthesia | Drugs for maintenance of anesthesia including Propofol, Dexmedetomidine, Remifentanil, Sufentanil, Rocuronium, Cisatracurium Besylate, Sevoflurane |
| Vasoactive agents | Vasoactive agents including Norepinephrine, Phenylephrine, Ephedrine, Dopamine, Dobutamine, Atropine, Esmolol, Urapidil, Nicardipine |

Abbreviation: SBP: systolic blood pressure; DBP: diastolic blood pressure.

**Supplementary Table 2. Clinical characteristics of patients with or without cognitive decline**

|  | **Total** | **Non-POCD group** | **POCD group** | **P value** |
| --- | --- | --- | --- | --- |
| **Comorbidities, Yes/No, n (%)** |  |  |  |  |
| Diseases of cardiovascular system | 92 (77.3)/27 (22.7) | 57 (74.0)/20 (26.0) | 35 (83.3)/7 (16.7) | 0.353 |
| Hypertension | 77 (64.7)/42 (35.3) | 47 (61.0)/30 (39.0) | 30 (71.4)/12 (28.6) | 0.351 |
| Ischemic heart diseases | 28 (23.5)/91 (76.5) | 18 (23.4)/59 (76.6) | 10 (23.8)/32 (76.2) | 1 |
| Heart failure | 1 (0.8)/118 (99.2) | 1 (1.3)/76 (98.7) | 0 (0.0)/42 (100.0) | 1 |
| Arrhythmia | 14 (11.8)/105 (88.2) | 8 (10.4)/69 (89.6) | 6 (14.3)/36 (85.7) | 0.739 |
| Deep venous thrombosis | 5 (4.2)/114 (95.8) | 3 (3.9)/74 (96.1) | 2 (4.8)/40 (95.2) | 1 |
| Diseases of respiratory system | 5 (4.2)/114 (95.8) | 4 (5.2)/73 (94.8) | 1 (2.4)/41 (97.6) | 0.655 |
| COPD | 1 (0.8)/118 (99.2) | 1 (1.3)/76 (98.7) | 0 (0.0)/42 (100.0) | 1 |
| Asthma | 1 (0.8)/118 (99.2) | 1 (1.3)/76 (98.7) | 0 (0.0)/42 (100.0) | 1 |
| Diseases of digestive system | 10 (8.4)/109 (91.6) | 8 (10.4)/69 (89.6) | 2 (4.8)/40 (95.2) | 0.491 |
| Gastroduodenal ulcer | 1 (0.8)/118 (99.2) | 1 (1.3)/76 (98.7) | 0 (0.0)/42 (100.0) | 1 |
| Reflux esophagitis | 3 (2.5)/116 (97.5) | 2 (2.6)/75 (97.4) | 1 (2.4)/41 (97.6) | 1 |
| Gastritis | 6 (5.0)/113 (95.0) | 5 (6.5)/72 (93.5) | 1 (2.4)/41 (97.6) | 0.422 |
| Diseases of urinary system | 6 (5.0)/113 (95.0) | 4 (5.2)/73 (94.8) | 2 (4.8)/40 (95.2) | 1 |
| Renal insufficiency | 2 (1.7)/117 (98.3) | 2 (2.6)/75 (97.4) | 0 (0.0)/42 (100.0) | 0.539 |
| Diseases of nervous system | 17 (14.3)/102 (85.7) | 11 (14.3)/66 (85.7) | 6 (14.3)/36 (85.7) | 1 |
| Ischemic stroke | 12 (10.1)/107 (89.9) | 8 (10.4)/69 (89.6) | 4 (9.5)/38 (90.5) | 1 |
| Hemorrhagic stroke | 3 (2.5)/116 (97.5) | 1 (1.3)/76 (98.7) | 2 (4.8)/40 (95.2) | 0.284 |
| Cerebrovascular stenosis | 3 (2.5)/116 (97.5) | 1 (1.3)/76 (98.7) | 2 (4.8)/40 (95.2) | 0.284 |
| Brain tumors | 2 (1.7)/117 (98.3) | 2 (2.6)/75 (97.4) | 0 (0.0)/42 (100.0) | 0.539 |
| Diseases of endocrine system | 37 (31.1)/82 (68.9) | 25 (32.5)/52 (67.5) | 12 (28.6)/30 (71.4) | 0.817 |
| Diabetes | 33 (27.7)/86 (72.3) | 22 (28.6)/55 (71.4) | 11 (26.2)/31 (73.8) | 0.95 |
| Thyroid disease | 3 (2.5)/116 (97.5) | 3 (3.9)/74 (96.1) | 0 (0.0)/42 (100.0) | 0.551 |
| Anemia | 24 (20.2)/95 (79.8) | 14 (18.2)/63 (81.8) | 10 (23.8)/32 (76.2) | 0.623 |
| History of anesthesia | 95 (79.8)/24 (20.2) | 64 (83.1)/13 (16.9) | 31 (73.8)/11 (26.2) | 0.332 |
| History of general anesthesia | 55 (46.2)/64 (53.8) | 40 (51.9)/37 (48.1) | 15 (35.7)/27 (64.3) | 0.132 |
| **Laboratory test results** |  |  |  |  |
| WBC count, 109/L | 5.54 [4.46, 6.59] | 5.35 [4.46, 6.59] | 6.06 [5.30, 6.55] | 0.116 |
| Neutrophils count, 109/L | 3.07 [2.45, 4.21] | 2.95 [2.38, 4.21] | 3.45 [2.55, 4.14] | 0.197 |
| Lymphocytes count, 109/L | 1.68 (0.55) | 1.65 (0.54) | 1.73 (0.57) | 0.402 |
| Hemoglobin, g/L | 124.00 [116.50, 131.50] | 124.00 [117.00, 132.00] | 122.50 [116.00, 130.00] | 0.537 |
| Platelet count, 109/L | 205.00 [173.50, 238.00] | 199.00 [173.00, 241.00] | 212.50 [175.75, 235.50] | 0.418 |
| Albumin, g/L | 37.34 (3.28) | 37.23 (2.87) | 37.55 (3.94) | 0.62 |
| Prealbumin, g/L | 206.00 [177.00, 237.00] | 210.00 [178.00, 235.00] | 201.50 [176.50, 241.25] | 0.914 |
| ALT, IU/L | 14.00 [11.50, 19.00] | 14.00 [11.00, 19.00] | 14.00 [12.00, 18.00] | 0.854 |
| AST, IU/L | 21.00 [18.00, 24.00] | 20.00 [18.00, 24.00] | 22.00 [19.00, 25.75] | 0.196 |
| Total bilirubin, umol/L | 11.63 [9.12, 16.20] | 11.97 [8.95, 15.52] | 11.33 [9.43, 16.78] | 0.945 |
| Direct bilirubin, umol/L | 3.82 [2.79, 5.12] | 3.82 [2.78, 5.12] | 3.80 [2.89, 5.26] | 0.909 |
| Indirect bilirubin, umol/L | 7.91 [6.12, 11.07] | 7.90 [6.10, 11.10] | 7.94 [6.18, 11.04] | 0.947 |
| Creatinine, umol/L | 66.00 [56.50, 77.50] | 68.00 [56.00, 77.00] | 66.00 [58.25, 80.75] | 0.887 |
| Creatinine clearance, ml/min | 62.05 [53.52, 77.22] | 61.15 [53.55, 76.07] | 67.34 [53.35, 79.40] | 0.483 |
| Kalium, mmol/L | 3.97 [3.78, 4.27] | 3.92 [3.78, 4.24] | 4.06 [3.86, 4.39] | 0.173 |
| Natrium, mmol/L | 142.00 [140.00, 143.00] | 142.00 [140.00, 143.00] | 141.00 [139.20, 143.00] | 0.538 |
| Glucose, mmol/L | 4.99 [4.59, 5.89] | 4.96 [4.54, 5.92] | 5.04 [4.62, 5.61] | 0.732 |
| PT, s | 13.10 [12.60, 13.50] | 13.00 [12.70, 13.40] | 13.10 [12.60, 13.50] | 0.944 |
| INR | 0.97 [0.94, 1.02] | 0.97 [0.94, 1.02] | 0.98 [0.92, 1.01] | 0.798 |
| APTT, s | 36.13 (3.92) | 36.36 (3.64) | 35.70 (4.40) | 0.379 |
| Fibrinogen, g/L | 3.26 [2.87, 3.81] | 3.11 [2.80, 3.78] | 3.34 [3.00, 3.86] | 0.184 |
| Thrombin time, s | 16.50 [16.00, 17.00] | 16.60 [16.00, 17.10] | 16.45 [16.00, 16.88] | 0.768 |

Abbreviation: BMI: body mass index; COPD: chronic obstructive pulmonary disease; WBC: white blood cell; ALT: alanine transaminase; AST: aspartate transaminase; PT: prothrombin time; INR: international normalized ratio; APTT: activated partial thromboplastin time; SD: standard deviation, IQR: interquartile range.
